# Supplementary material for: Parental age effect on the longevity and healthspan in Drosophila melanogaster and Caenorhabditis elegans
Source: publisher site journal article supplement (doi:10.18632/aging.205098), 2023-11-01
Supplement: Supplementary file [file aging-v15i21-205098-supplementary-material-SD2.pdf]

## SUPPLEMENTARY TABLES

**Supplementary Table 1. Lifespans of the wild type strains used in this study.**

| Strain  | 95% C.I. (days) | Mean LS $\pm$ SE (days) | Number of animals | Trans generational experiments |
|---------|-----------------|-------------------------|-------------------|--------------------------------|
| CX11262 | 16.8 ~ 17.8     | 17.29 $\pm$ 0.26        | 332               |                                |
| JU829e  | 16.8 ~ 18.2     | 17.48 $\pm$ 0.35        | 163               |                                |
| JU1200c | 13 ~ 14.2       | 13.57 $\pm$ 0.31        | 153               |                                |
| CB4856  | 21.4 ~ 22.7     | 22.04 $\pm$ 0.33        | 357               |                                |
| CB4852  | 18.5 ~ 19.1     | 18.77 $\pm$ 0.15        | 474               |                                |
| JU775d  | 23.2 ~ 25.3     | 24.26 $\pm$ 0.56        | 159               |                                |
| JU1088c | 15.7 ~ 17       | 16.36 $\pm$ 0.33        | 256               | **                             |
| JU1440c | 16.4 ~ 17.6     | 17.01 $\pm$ 0.32        | 230               | **                             |
| N2c     | 17.8 ~ 18.5     | 18.14 $\pm$ 0.17        | 667               | *                              |
| JU1171e | 17.7 ~ 18.6     | 18.18 $\pm$ 0.21        | 342               | *                              |
| JU1652c | 18.6 ~ 19.9     | 19.27 $\pm$ 0.33        | 184               | *Named C                       |
| JU319b  | 21.6 ~ 23.4     | 22.48 $\pm$ 0.45        | 339               | *Named A                       |
| JU1580f | 21.4 ~ 23.4     | 22.39 $\pm$ 0.53        | 96                | *Named B                       |

Abbreviation: LS: lifespan. \*Indicates lines used in transgenerational experiments. \*\*Indicates lines in which the SG lifespans have varied over several years of analysis. Lowercase letters (a–f) indicate different isolines. For strains without isolate designations, the lifespans did not vary significantly between isolines.

**Supplementary Table 2. Fecundity of the *C. elegans* progeny.**

| Genotype-Condition | Mating status | Brood size <sup>†</sup> | % Matricide | N  |
|--------------------|---------------|-------------------------|-------------|----|
| JU1440c-SG         | mated         | 406.7 $\pm$ 70.2        | 50          | 10 |
| N2c-SG             | mated         | 305.3 $\pm$ 168.1       | 30          | 10 |
| JU319b-SG          | mated         | 219.5 $\pm$ 81.1        | 20          | 10 |
| JU1200a-SG         | mated         | 535.8 $\pm$ 112.9       | 23          | 13 |
| N2c-SG             | mated         | 546.9 $\pm$ 71.6        | 23          | 13 |
| JU1580a-SG         | mated         | 444.2 $\pm$ 97.8        | 23          | 13 |
| Genotype-Condition | Mating status | Brood size <sup>§</sup> | % Matricide | N  |
| N2c-SG4            | fecundated    | 589 $\pm$ 87            | 6           | 30 |
| N2c-LG2            | fecundated    | 560 $\pm$ 99            | 6           | 30 |
| N2c-LG2SG1         | fecundated    | 556 $\pm$ 71            | 0           | 30 |
| N2c-SG4            | self-mated    | 264 $\pm$ 27            | 0           | 18 |
| N2c-LG2            | self-mated    | 218 $\pm$ 131           | 0           | 18 |
| N2c-LG2SG1         | self-mated    | 291 $\pm$ 57*           | 0           | 20 |
| JU319b-SG4         | fecundated    | 442 $\pm$ 79            | 56          | 30 |
| JU319b-LG2         | fecundated    | 380 $\pm$ 58            | 50          | 30 |
| JU319b-LG2SG1      | fecundated    | 311 $\pm$ 102           | 73          | 30 |
| JU319b-SG4         | self-mated    | 203 $\pm$ 29            | 10          | 20 |
| JU319b-LG2         | self-mated    | 194 $\pm$ 71            | 35          | 20 |
| JU319b-LG2SG1      | self-mated    | 222 $\pm$ 30            | 35          | 20 |

Data used to construct Figure 3 are indicated. <sup>†</sup>Brood size scored from day 0 to day 5 of adulthood. Mated hermaphrodites were crossed to males for 48 h on the first 2 days of adulthood. <sup>§</sup>Brood size scored from 36 h to 156 h of adulthood. Cross-fertilized animals were selected after mating with Mitotracker CMXRos-labeled males. Self-fertilized brood sizes were scored from 0 h to 156 h of adulthood. Values are the mean  $\pm$  SD of the indicated number of animals. \* $p < 0.05$  vs. the SG animals by one-way ANOVA with Kruskal-Wallis test.
